# Supplementary material
Source: publisher figshare collection journal article supplement (https://acs.figshare.com/ndownloader/files/4187002)
Supplement: Supplementary file 1 [file 4187002]

*Supplementary Information*

**Enhanced electricity production using reconstituted  
artificial consortia of estuarine bacteria grown as  
biofilms**

Jinwei Zhang, Enren Zhang <sup>1</sup>, Keith Scott <sup>2</sup>, and J. Grant Burgess <sup>\*</sup>

Dove Marine Laboratory,  
School of Marine Science and Technology,  
Newcastle University, NE30 4PZ, UK

<sup>1</sup>Department of Chemistry and Chemical Engineering,  
Yangzhou University, Yangzhou City 225002, China

<sup>2</sup>School of Chemical Engineering and Advanced Materials,  
Newcastle University, NE1 7RU, UK

<sup>\*</sup>Corresponding author:

Tel.: +44 (0)191 222 3057

grant.burgess@ncl.ac.uk

J. Zhang and E. Zhang contributed equally to this work.

## Supplementary Figure S1

### A typical electrochemical impedance spectra for a dual-chamber MFC

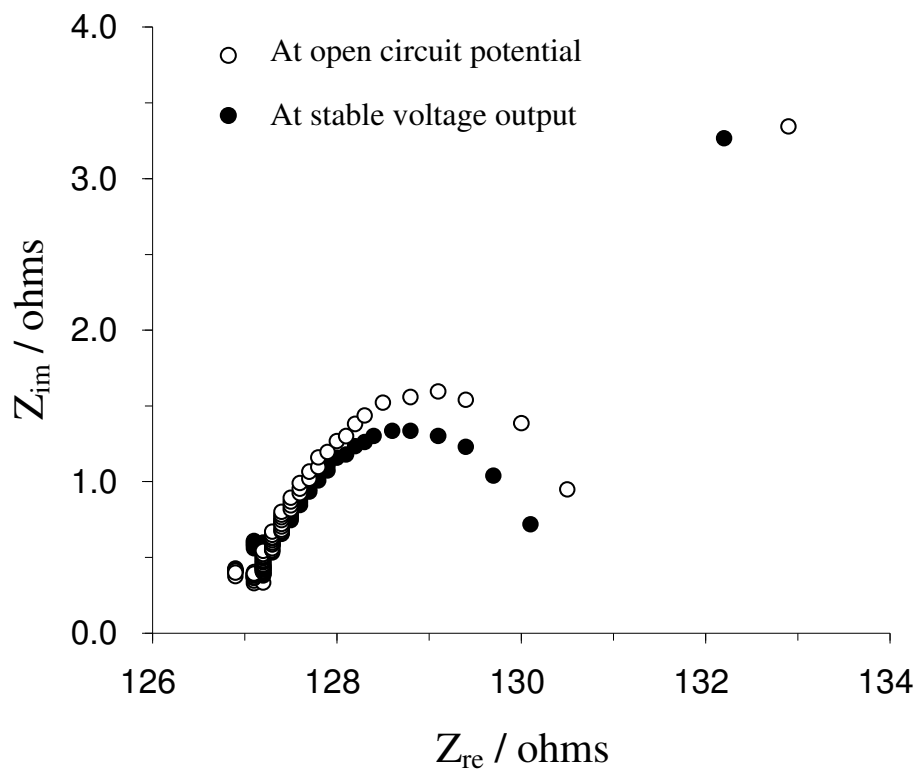

**Figure S1** Electrochemical impedance spectra measurements were performed over a frequency range of 0.5Hz to 100 kHz at open circuit potential and stable voltage output, respectively, with a perturbation signal of 10 mV. MFC internal resistance, reflecting ion transport through solution and cation exchange membrane, is about 127 ohms.
